# Supplementary material for: Micro-tensile behavior of Scots pine sapwood after heat treatments in superheated steam or pressurized hot water
Source: Springer Nature journal article supplement (doi:10.1007/s10853-020-04943-6), 2020-06-16
Supplement: MOESM1 [file 18089760]

## Supplementary material

### Micro-tensile behavior of Scots pine sapwood after heat-treatments in superheated steam or pressurized hot water

Michael Altgen<sup>1\*</sup>, Muhammad Awais<sup>1</sup>, Daniela Altgen<sup>1</sup>, Suvi Kyyrö<sup>1</sup>, Hanna Seppäläinen<sup>1</sup>, Lauri Rautkari<sup>1</sup>

<sup>1</sup> Aalto University, School of Chemical Engineering, Department of Bioproducts and Biosystems, P.O. Box 16300, 00076 Aalto, Finland

\*corresponding author: michael.altgen@aalto.fi, Tel. +358503841611

Table S. 1: FTIR band assignments

| Band (cm <sup>-1</sup> ) | Assignment                                                                                         | References |
|--------------------------|----------------------------------------------------------------------------------------------------|------------|
| 809                      | vibration of mannan and C-H out-of-plane bending vibration in lignin                               | [1–3]      |
| 870                      | vibration of mannan and C-H out-of-plane bending vibration in lignin                               | [1–3]      |
| 898                      | Anomeric carbon group frequency in cellulose and hemicelluloses                                    | [1,3]      |
| 1029                     | C-H in-plane deformation and C=O stretching vibration in cellulose, hemicelluloses and lignin      | [1,4]      |
| 1053                     | C-O stretching in cellulose and hemicellulose                                                      | [5]        |
| 1105                     | O-H association band in cellulose and hemicellulose                                                | [1,6]      |
| 1158                     | C-O-C asymmetric stretching vibration in cellulose and hemicelluloses                              | [1]        |
| 1231                     | C=O stretching in carbonyl groups and C-O-C asymmetric stretching vibration of aryl ether linkages | [1,7]      |
| 1264                     | C-O-C asymmetric stretching vibration of aryl ether linkages                                       | [7]        |
| 1316                     | CH <sub>2</sub> wagging mode in cellulose                                                          | [1–3]      |
| 1369                     | H-O-H bending in adsorbed water and C-H bending vibration in celluloses and hemicelluloses         | [1,3,5,7]  |
| 1424                     | Aromatic skeletal vibrations in lignin and C-H in-plane deformation                                | [4,6]      |
| 1453                     | C=C stretching vibration in aromatic ring in lignin and CH <sub>2</sub> vibration in cellulose     | [3]        |
| 1509                     | Aromatic skeletal vibrations in lignin                                                             | [4,7,8]    |
| 1598                     | Aromatic skeletal vibrations in lignin and C=O stretching                                          | [4,5,7,8]  |
| 1643                     | H-O-H deformation in absorbed water in carbohydrates and C=O stretching vibration in lignin.       | [1,3,7]    |
| 1730                     | C=O stretching of acetyl or carboxylic acid                                                        | [2,7]      |

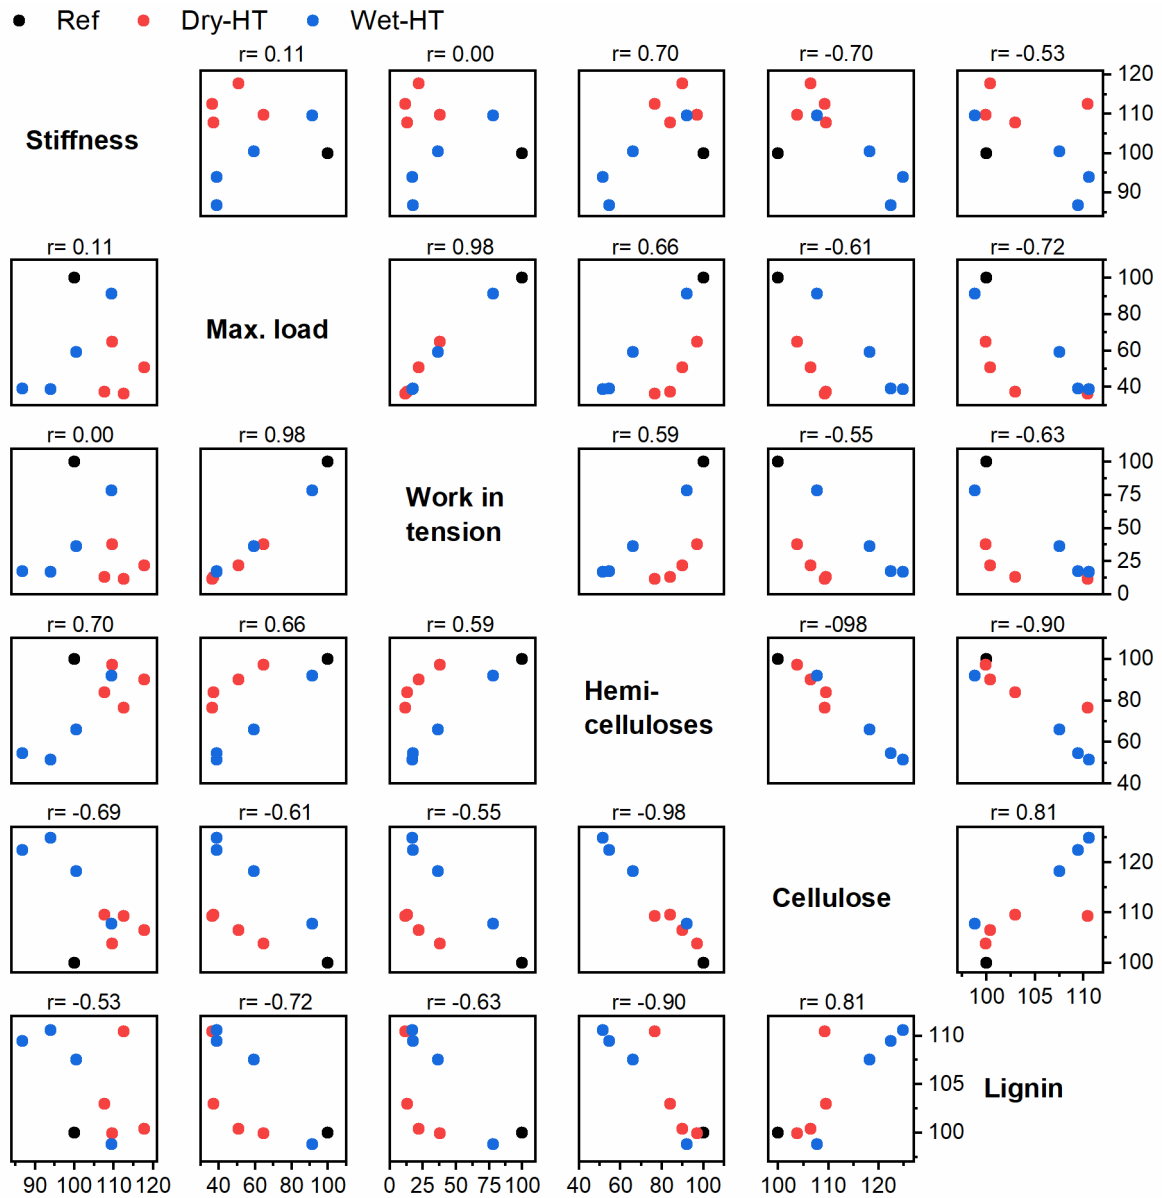

Fig. S. 1: Scatter matrix of the residual tensile properties and the chemical constituents (all in % of Ref) based on the tensile measurements in conditioned state. Each data point represents the average value per sample group (treatment technique and treatment duration). The Pearson correlation coefficient based on all data points is shown at the top of each scatter plot.

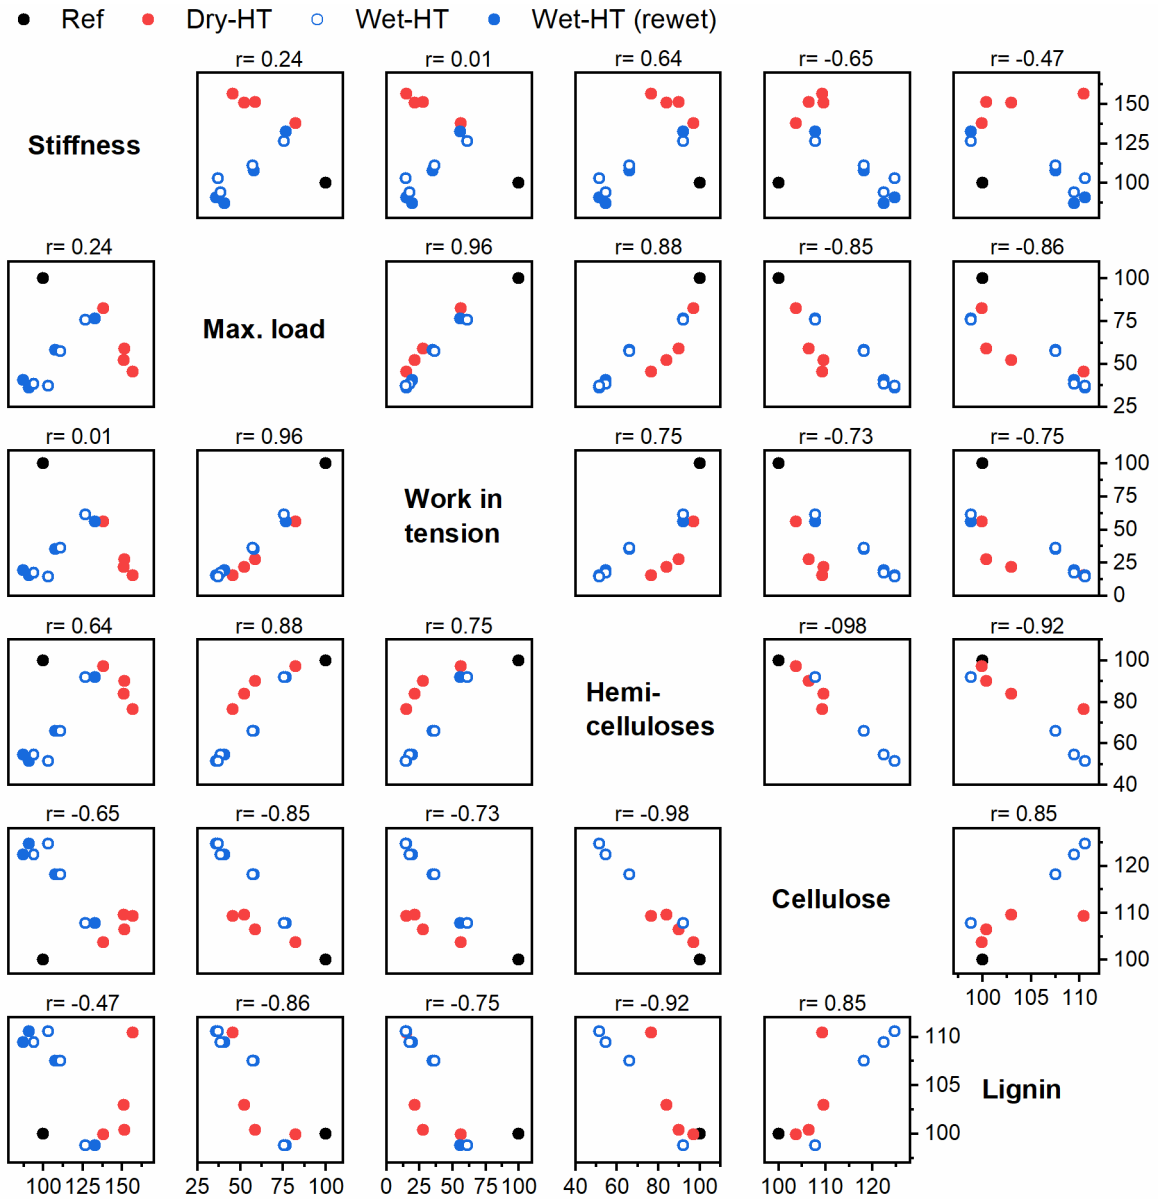

Fig. S. 2: Scatter matrix of the residual tensile properties and the chemical constituents (all in % of Ref) based on the tensile measurements in water-saturated state. Each data point represents the average value per sample group (treatment technique and treatment duration). The Pearson correlation coefficient based on all data points is shown at the top of each scatter plot.

## References

- [1] Harrington KJ, Higgins HG, Michell AJ (1964) Infrared spectra of *Eucalyptus regnans* F. Muell. and *Pinus radiata* D. Don, *Holzforschung* 18:108-113.
- [2] Marchessault RH (1962) Application of infra-red spectroscopy to cellulose and wood polysaccharides, *Pure Appl. Chem.* 5:107-129.
- [3] Evans PD, Michell AJ, Schmalzl KJ (1992) Studies of the degradation and protection of wood surfaces, *Wood Sci. Technol.* 26:151–163.
- [4] Faix O (1991) Classification of lignins from different botanical origins by FT-IR spectroscopy, *Holzforsch. - Int. J. Biol. Chem. Phys. Technol. Wood.* 45:21-27.
- [5] Pandey KK, Theagarajan KS (1997) Analysis of wood surfaces and ground wood by diffuse reflectance (DRIFT) and photoacoustic (PAS) Fourier transform infrared spectroscopic techniques, *Holz Roh- Werkst.* 55:383–390.
- [6] Kotilainen RA, Toivanen TJ, Alén RJ (2000) FTIR monitoring of chemical changes in softwood during heating, *J. Wood Chem. Technol.* 20:307–320.
- [7] Zhang J, Kamdem DP (2000) FTIR characterization of copper ethanolamine–wood interaction for wood preservation, *Holzforschung.* 54:119-122.
- [8] Faix O, Beinhoff O (1988) FTIR spectra of milled wood lignins and lignin polymer models (DHP's) with enhanced resolution obtained by deconvolution, *J. Wood Chem. Technol.* 8:505–522.
